# Supplementary material
Source: publisher figshare collection journal article supplement (https://acs.figshare.com/ndownloader/files/3785338)

# Supporting information

## **Hindered Phenol Derivative as a Multifunctional Additive in Lithium Complex Grease**

Mianran Chao,<sup>†,‡</sup> Weimin Li,<sup>†</sup> Lvfang Chen,<sup>§</sup> Xiaobo Wang<sup>\*,†</sup>

<sup>†</sup>State Key Laboratory of Solid Lubrication, Lanzhou Institute of Chemical Physics,  
Chinese Academy of Sciences, Lanzhou 730000, PR China

<sup>‡</sup>University of Chinese Academy of Sciences, Beijing 100049, PR China

<sup>§</sup>Lanzhou Lubricating Oil Plant, PetroChina, Lanzhou 730000, PR China

### **AUTHOR INFORMATION**

#### **Corresponding Author**

\*Tel.: +86-931-4968285. Fax: +86-931-8277088. E-mail: wangxb@licp.cas.cn.

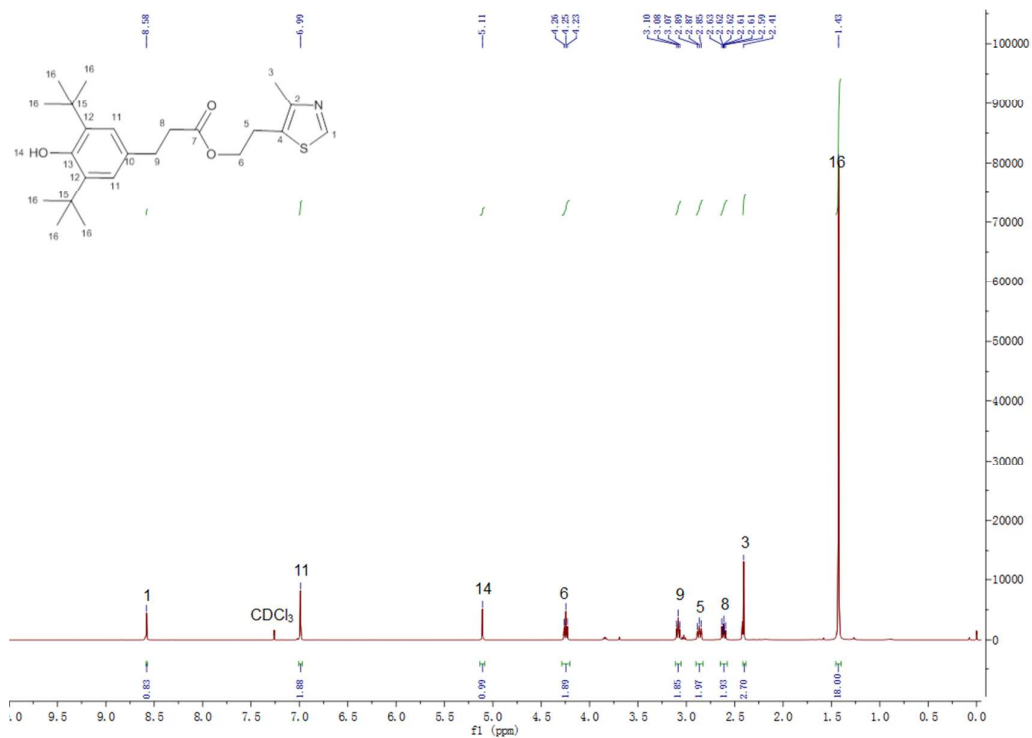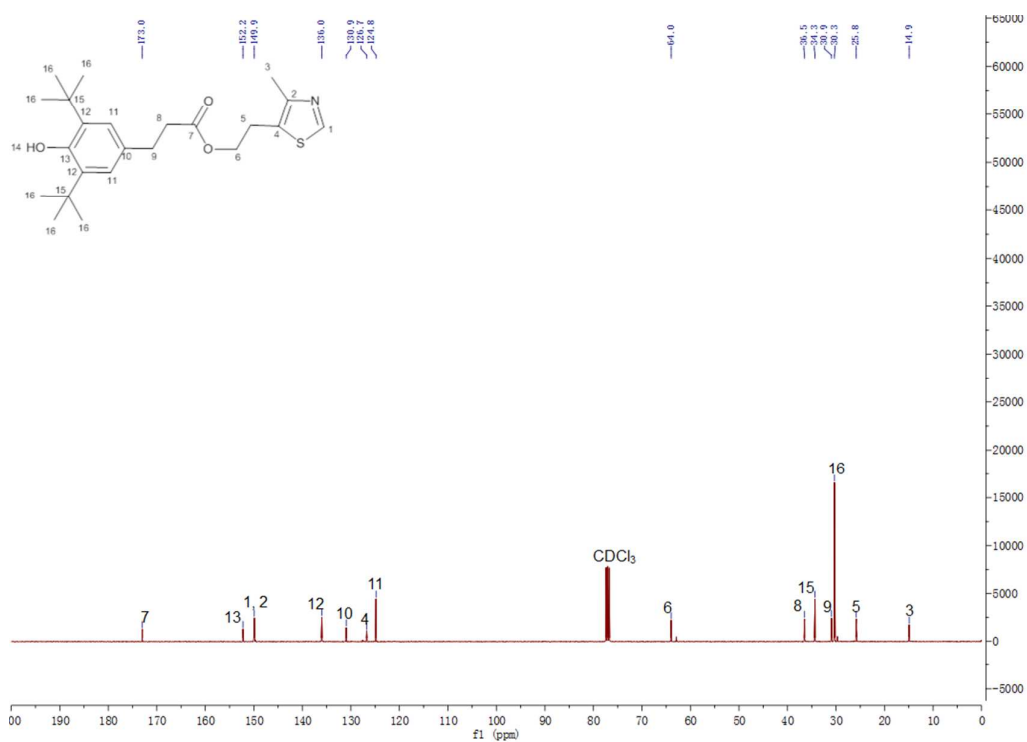

Supplement: Supplementary file 1 [file 3785338]
